# Supplementary material
Source: Research Square preprint supplement (doi:10.21203/rs.3.rs-9042483/v1)
Supplement: Supplementary file 1 [file f858ca434a0eae85ecfc527a.docx]

**Start with informed consent and sign**

**Explain the research**

**Part A: Demographic details**

- Highest level of completed education
- Current title and responsibilities
- Previous work experience
- Why did you join this profession?

**Part B: Organization-related challenges**

- Tell me about your organization. How would you describe its core activity?
- Why did you join this organization?
- What kind of condom promotion activities does it get involved in? Are there any brochures/print-audio-visual materials that you could share with us?
- How would you rate your organization on following parameters: *(Let’s keep in mind campaign undertaken by the organization to promote condoms. Can you describe the campaign?)*
  - Target audience focus
  - Research orientation and focus
  - Evolving marketing objectives and strategy
  - Implementation of campaign
  - Success with social change attempts
  - Resources
  - Barriers experienced
  - Reputation within social marketing circles and society in general

**Part C: Institutional elements (inward looking)?**

*Now let’s talk about how you and your organization manage influence of stakeholders and other elements keeping in mind government, culture, media etc.*

- In relation to your condom promotion efforts, can you name a few stakeholders? Write this list on a sheet.
- Referring to the sheet with the list of identified stakeholders, can you name the five most influential stakeholders? (These can even be government)
- What factors determine selection of these stakeholders? What process do you follow to identify these stakeholders?
- For each stakeholder mentioned above, let’s discuss following topics:
  - What is their stake in your campaign?
  - What is their influence and degree of influence?
  - On what factors do you assess their influence? What process do you follow in order to assess their influence? Do you conduct research to asses their influence. If yes, what research do you conduct and when?
  - Let’s talk about how you and your organization manage (create, build, and sustain) relationships with these stakeholders.
    - What is your end objective in managing relationships with stakeholders?
    - How (the process) do you create, build, and sustain (also – prevent or address crisis) relationships with stakeholders to achieve your end objectives?
    - What role do trust and commitment play in managing these relationships?
- Would you call the interactions with stakeholders as ‘relationships?’ if not, what would you call them?
- Which relationships tend to last long term and which ones last short term? Why?
- How much of your work time in a typical week goes into managing stakeholders – how much is preventive, how much is crisis reduction?
- How has been your experience of managing stakeholders?

**Part C: Institutional elements (outward looking)?**

- What are some of the important social issues facing India and how they are linked to condom promotions?
- Can you explain one experience of one of your campaigns that had barriers in promoting condoms?
- Who were involved?
- What happened?
- Did you resolve it?
- If so how?
- Can you explain one experience that one of your campaigns was successful?
- Who were involved?
- What happened?
